# Supplementary material for: Deep divergence and rapid evolutionary rates in gut-associated Acetobacteraceae of ants
Source: PubMed Central journal article supplement (PMC4939635; doi:10.1186/s12866-016-0721-8), 2016-07-11
Supplement: 12866_2016_721_MOESM6_ESM.pdf [file 12866_2016_721_MOESM6_ESM.pdf]

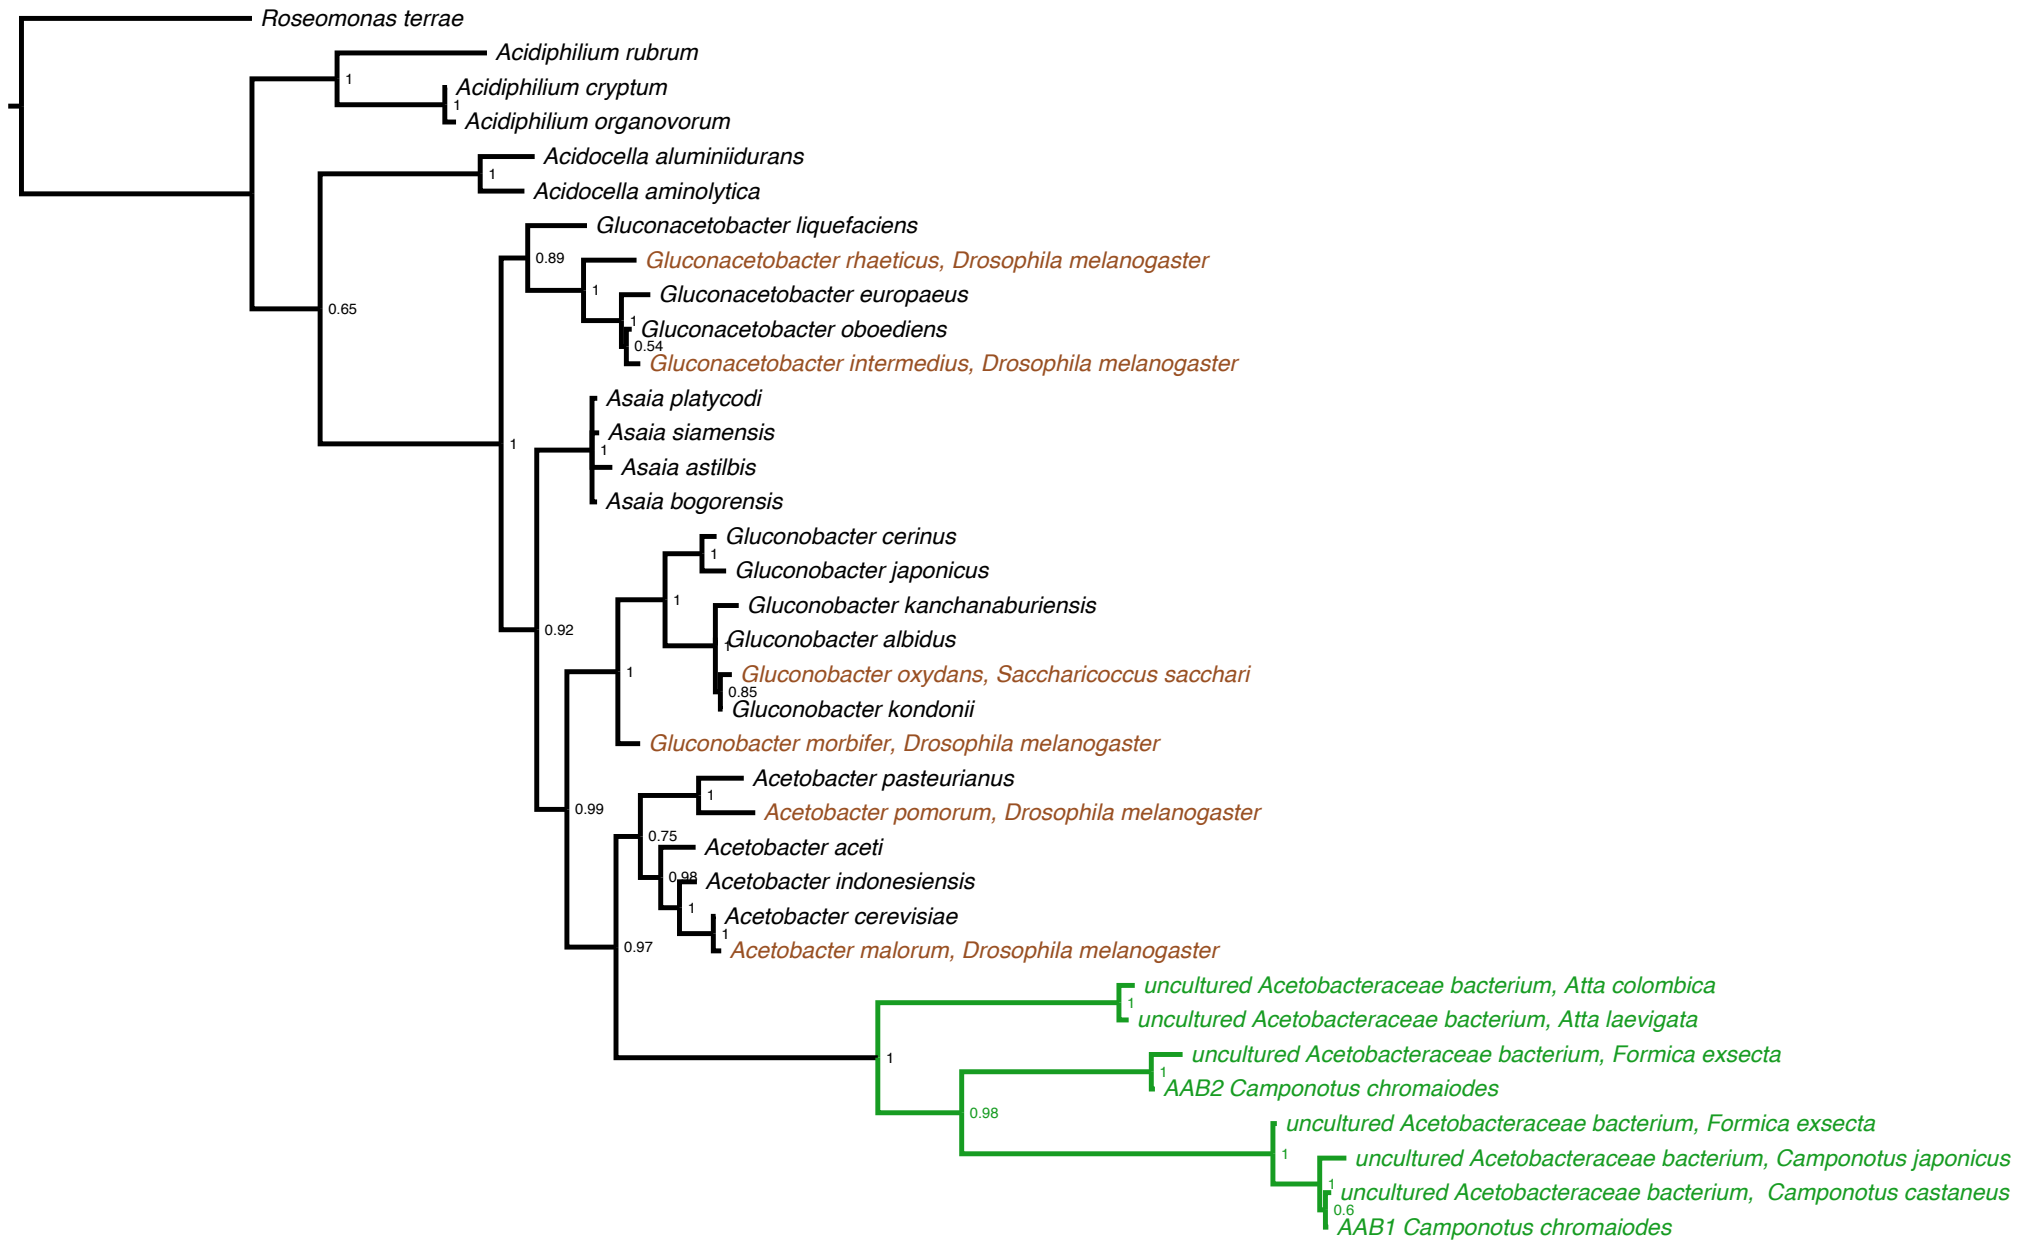

0.3
